# Supplementary material for: Gq-Mediated Arrhythmogenic Signaling Promotes Atrial Fibrillation
Source: MDPI journal article supplement (doi:10.3390/biomedicines11020526), 2023-02-11
Supplement: s1 [file s1]

# **G<sub>q</sub>-mediated arrhythmogenic signaling promotes atrial fibrillation**

Felix Hohendanner, M.D. Ph.D.<sup>1,2,3</sup>; Ashok Prabhu<sup>1</sup>, Nicola Wilck, M.D.<sup>2,3,4,5,6</sup>; Verena Stangl, M.D.<sup>2,3,7</sup>; Burkert Pieske, M.D.<sup>1,2,3</sup>; Karl Stangl, M.D.<sup>2,3,7</sup>; Till F. Althoff, M.D.<sup>2,3,7,8,9</sup>

<sup>1</sup> Charité – University Medicine Berlin, Campus Virchow-Klinikum, Department of Cardiology and German Heart Center, Augustenburger Platz 1, 13353 Berlin, Germany

<sup>2</sup> DZHK (German Centre for Cardiovascular Research), partner site Berlin, 13316 Berlin, Germany

<sup>3</sup> Berlin Institute of Health at Charité – Universitätsmedizin Berlin, 10117 Berlin, Germany

<sup>4</sup> Max Delbrück Center for Molecular Medicine in the Helmholtz Association (MDC), 13125 Berlin, Germany

<sup>5</sup> Experimental and Clinical Research Center (ECRC), a cooperation of Charité - Universitätsmedizin Berlin and Max Delbrück Center for Molecular Medicine (MDC), 13125 Berlin, Germany

<sup>6</sup> Department of Nephrology and Medical Intensive Care Medicine, Charité - Universitätsmedizin Berlin, 10117 Berlin, Germany

<sup>7</sup> Charité – University Medicine Berlin, Department of Cardiology and Angiology, Charité Campus Mitte, Charitéplatz 1, 10117 Berlin, Germany

<sup>8</sup> Arrhythmia Section, Cardiovascular Institute (ICCV), Hospital Clínic, Universitat de Barcelona, C/Villarroel N° 170, 08036 Barcelona, Catalonia, Spain

<sup>9</sup> Institut d'Investigacions Biomèdiques August Pi i Sunyer (IDIBAPS), 08036 Barcelona, Catalonia, Spain

Correspondence: althoff@clinic.cat

**Short Title:** G<sub>q</sub>-signaling in atrial fibrillation

## Supplementary Figures

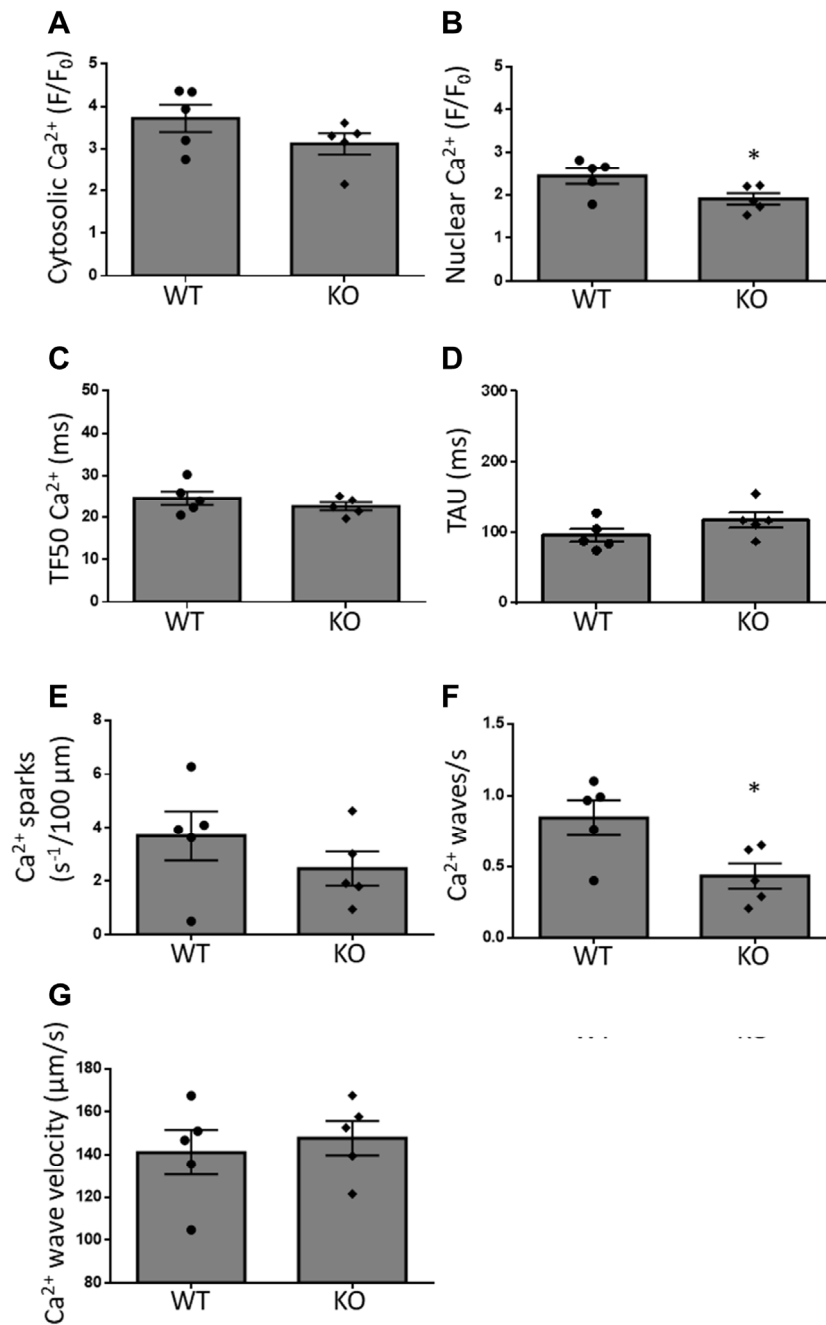

**Supplementary Figure S1. Per-animal analyses of  $\text{Ca}^{2+}$  signaling.** Quantification of maximal cytosolic (A) and nuclear  $\text{Ca}^{2+}$  release (B), time to 50% of maximal cytosolic  $\text{Ca}^{2+}$  release (TF50) (C), the time constant of  $\text{Ca}^{2+}$  decay/removal (TAU) (D), subcellular  $\text{Ca}^{2+}$  spark frequency (E), as well as arrhythmic  $\text{Ca}^{2+}$  wave frequency (F) and propagation velocity (G). The total number of animals per group was  $n=5$ . \* $p<0.05$  vs. WT.

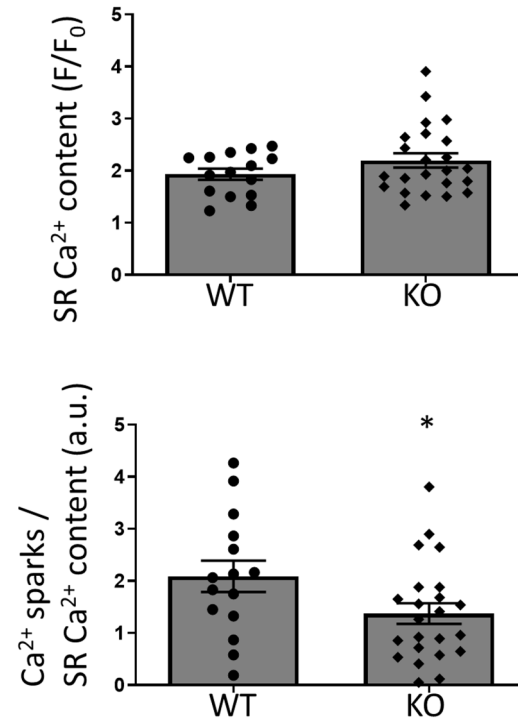

**Supplementary Figure S2.** SR Ca<sup>2+</sup> content in WT and KO mice as obtained with caffeine (top). Ca<sup>2+</sup> spark frequency as corrected for SR Ca<sup>2+</sup> content (ratio, a.u.).

\*p<0.05 vs. KO.
